# Supplementary material
Source: PubMed Central journal article supplement (PMC2670167)
Supplement: M805940200_1.pdf [file M805940200_1.pdf]

**Movie 1** Toca-1 induces neurite outgrowth and filopodia formation in N1E115 cells. The movie was taken in 10 min with 60 frames and 10 sec interval.

**Movie 2** N-WASP induces neurite outgrowth and filopodia formation in N1E115 cells. The movie was taken in 10 min with 60 frames and 10 sec interval.
